# Supplementary material for: 2,2′-Biquinolines as test pilots for tuning the colour emission of luminescent mesomorphic silver(i) complexes
Source: Royal Society of Chemistry journal article supplement (doi:10.1039/c0dt01842b), 2011-01-01

## **2,2'-biquinolines as test pilots for tuning the colour emission of luminescent mesomorphic silver(I) complexes**

Daniela Pucci,<sup>\*a</sup> Alessandra Crispini,<sup>a,b</sup> Mauro Ghedini,<sup>a</sup> Elisabeta I. Szerb<sup>a</sup> and Massimo La Deda<sup>a,b</sup>

<sup>a</sup>  
Email address: [d.pucci@unical.it](mailto:d.pucci@unical.it)

### **Contents**

1. TGA and DSC thermograms of Complexes **1** - **4**
2. PXRD data for complexes **3** and **4**.
3. Absorption data and spectra of **L<sup>1</sup>**, **L<sup>3</sup>**, **1** and **3**

## 1. DSC and TGA thermograms of Complexes 1 and 2

The thermal stability of complexes **1** - **4** was tested both by thermogravimetric analysis (TGA) and differential scanning calorimetry (DSC).

The TGA scans of both complexes **1** and **2** reveal a desolvation process of one water molecule in a single narrow step (90-100°C), in correspondence with an endotherm peak ( $\Delta H = 57.8$  KJ/mol for complex **1** and  $\Delta H = 59.4$  KJ/mol for complex **2**) observed by DSC (Figure S1). Thermogravimetric data for the complex **1**: experimental mass loss (3.3%) corresponds to one water molecule (calcd. 3.4%). Thermogravimetric data for the complex **2**: experimental mass loss (2.7%) corresponds to one water molecule (calcd. 2.8%).

For the liquid crystalline complexes **3** and **4**, no thermal processes were detected on TGA scans until 250°C, where decomposition occurs.

Figure S1.

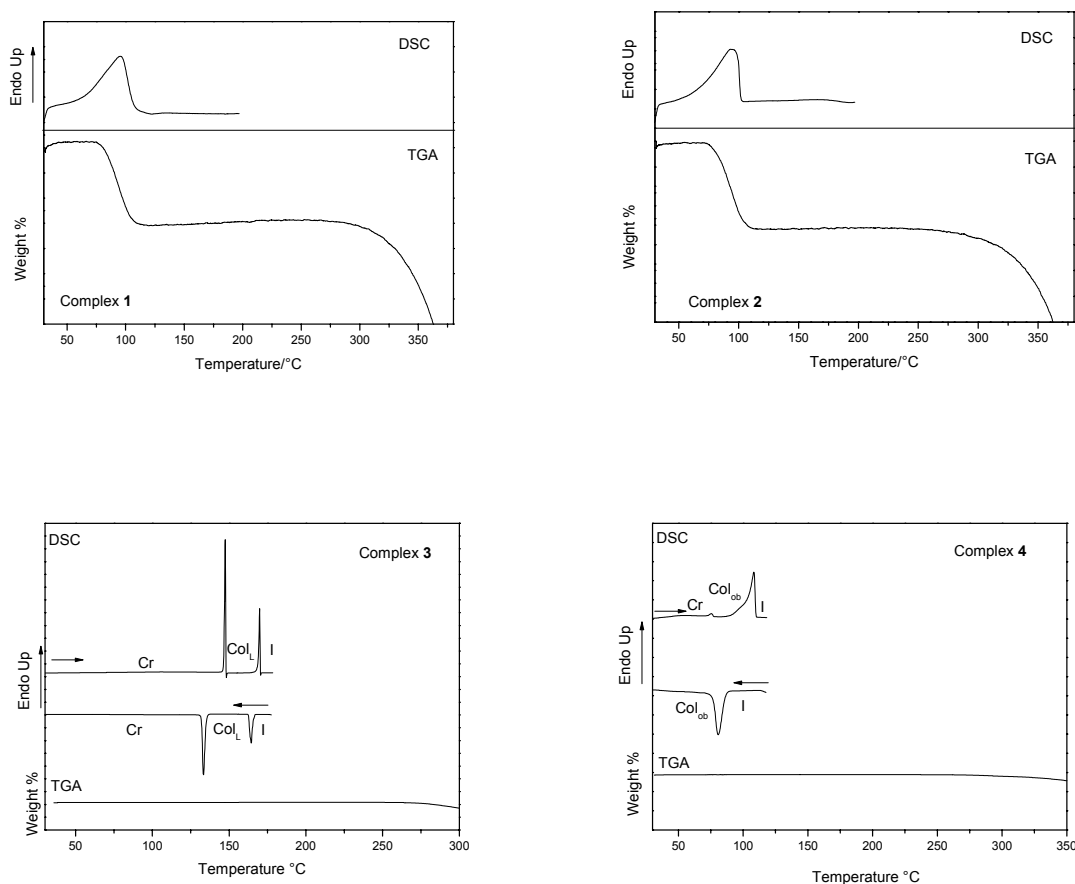

## 2. PXRD data for complexes 3 and 4.

Table S1

| Complex     | Mesophase lattice constants/Å                                                                                                              | $d_{\text{meas}}/\text{Å}$<br>( $d_{\text{calcd}}/\text{Å}$ ) | Miller indice <sup>1</sup><br>$hk$                                                                                     |
|-------------|--------------------------------------------------------------------------------------------------------------------------------------------|---------------------------------------------------------------|------------------------------------------------------------------------------------------------------------------------|
| <b>3</b>    | Col <sub>L</sub> at 155°C<br>(on heating)<br>$a = 9.79 \text{ Å}$<br>$b = 8.96 \text{ Å}$<br>$c = 31.9 \text{ Å}$<br>$\gamma = 85.6^\circ$ | 31.5 (31.9)                                                   | 001                                                                                                                    |
|             |                                                                                                                                            | 15.8 (15.9)                                                   | 002                                                                                                                    |
|             |                                                                                                                                            | 10.6(10.6)                                                    | 003                                                                                                                    |
|             |                                                                                                                                            | 9.7 (9.8)                                                     | 100                                                                                                                    |
|             |                                                                                                                                            | 8.9 (8.9)                                                     | 010                                                                                                                    |
|             |                                                                                                                                            | 8.4 (8.3)                                                     | 102                                                                                                                    |
|             |                                                                                                                                            | 7.8 (7.8)                                                     | 012                                                                                                                    |
|             |                                                                                                                                            | 7.2 (7.2)                                                     | 103                                                                                                                    |
|             |                                                                                                                                            | 6.7 (6.7)                                                     | 111                                                                                                                    |
|             |                                                                                                                                            | 6.2 (6.2)                                                     | 104                                                                                                                    |
|             |                                                                                                                                            | 4.9 (4.9)                                                     | 200                                                                                                                    |
|             |                                                                                                                                            | 4.3                                                           | $h_{\text{CH}}$                                                                                                        |
|             |                                                                                                                                            | 3.4                                                           | $h$                                                                                                                    |
|             |                                                                                                                                            | <b>4</b>                                                      | Col <sub>obp</sub> at 30°C<br>(on cooling)<br>$a = 42.01 \text{ Å}$<br>$b = 35.78 \text{ Å}$<br>$\gamma = 112.3^\circ$ |
| 33.3 (33.3) | 010                                                                                                                                        |                                                               |                                                                                                                        |
| 21.7 (21.7) | 110                                                                                                                                        |                                                               |                                                                                                                        |
| 13.9 (14.0) | $3\bar{1}0$                                                                                                                                |                                                               |                                                                                                                        |
| 13.0 (13.0) | 300                                                                                                                                        |                                                               |                                                                                                                        |
| 11.9 (11.9) | $1\bar{3}0$                                                                                                                                |                                                               |                                                                                                                        |
| 10.5 (10.5) | $4\bar{1}0$                                                                                                                                |                                                               |                                                                                                                        |
| 8.8 (8.8)   | $1\bar{4}0$                                                                                                                                |                                                               |                                                                                                                        |
| 6.6 (6.6)   | 050                                                                                                                                        |                                                               |                                                                                                                        |
| 6.0 (6.0)   | 340                                                                                                                                        |                                                               |                                                                                                                        |
| 4.4         | 001, $h_{\text{ch}}$                                                                                                                       |                                                               |                                                                                                                        |
| 3.4         | $h_0$                                                                                                                                      |                                                               |                                                                                                                        |

### 3. Absorption data and spectra of L<sup>1</sup>, L<sup>3</sup>, 1 and 3

Table S2. Absorption maxima recorded in dichloromethane solution at room temperature

| compound       | Abs, $\lambda/nm(\epsilon/M^1cm^{-1})$                                        |
|----------------|-------------------------------------------------------------------------------|
| L <sup>1</sup> | 365(5000), 338 (21200), 326(25000), 315 (21200), 300(sh), 290(sh), 260(69200) |
| L <sup>2</sup> | 360(sh), 350 (sh) ,340 (24900), 325(sh), 270(43800)                           |
| L <sup>3</sup> | 380(1270), 350(sh), 340 (25160), 320(sh), 270(46500)                          |
| L <sup>4</sup> | 366(1180), 340(sh), 330(25800), 310(sh), 300(sh), 280(sh), 262(83300)         |
| 1              | 380(sh), 356(26200), 340(21950), 330(sh), 295(10260), 284(13080), 265(73400)  |
| 2              | 390(sh), 370 (24200), 360(sh), 312 (10600), 300(sh), 274(60200)               |
| 3              | 400(sh), 367(24150), 360(sh), 312(10920), 305(sh), 274(61300)                 |
| 4              | 380(sh), 358 (16400), 330(sh), 310(sh), 300(31200), 280(sh), 265(92600)       |

Figure S2. Absorption spectra of L<sup>1</sup> (a), L<sup>3</sup> (b), 1 (c) and 3 (d) in dichloromethane solution

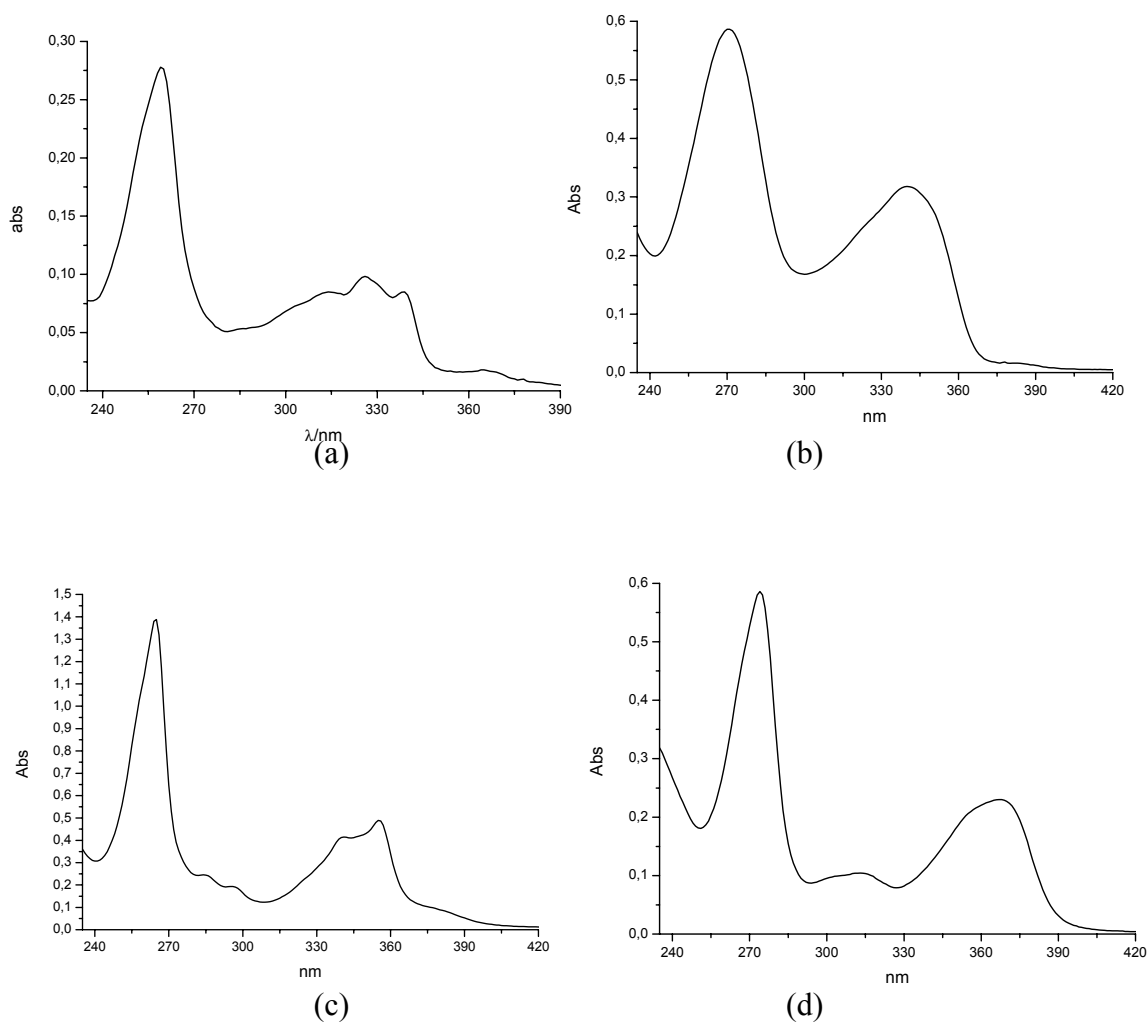

Supplement: c0dt01842b.pdf [file c0dt01842b.pdf]
